# Supplementary material for: Preclinical Lead Optimization of a 1,2,4-Triazole Based Tankyrase Inhibitor
Source: PubMed Central journal article supplement (PMC8008393; doi:10.1021/acs.jmedchem.0c00208), 2020-06-08
Supplement: jm0c00208_si_001.pdf [file jm0c00208_si_001.pdf]

## Supplementary Information

### Pre-clinical lead optimization of a 1,2,4-triazole based tankyrase inhibitor

Jo Waaler,<sup>\*,†,‡,§</sup> Ruben G. G. Leenders,<sup>§,#</sup> Sven T. Sowa,<sup>†,#</sup> Shoshy Alam Brinch,<sup>†,‡</sup> Max Lycke,<sup>†,‡</sup> Piotr Nieczypor,<sup>§</sup> Sjoerd Aertssen,<sup>§</sup> Sudarshan Murthy,<sup>†</sup> Albert Galera-Prat,<sup>†</sup> Eddy Damen,<sup>§</sup> Anita Wegert,<sup>§</sup> Marc Nazaré,<sup>||</sup> Lari Lehtiö,<sup>†</sup> and Stefan Krauss<sup>†,‡</sup>

<sup>†</sup>Hybrid Technology Hub - Centre of Excellence, Institute of Basic Medical Sciences, University of Oslo, P.O. Box 1110 Blindern, 0317, Oslo, Norway.

<sup>‡</sup>Department of Immunology and Transfusion Medicine, Oslo University Hospital, P.O. Box 4950 Nydalen, 0424, Oslo, Norway.

<sup>§</sup>Mercachem BV, Kerkenbos 1013, 6546 BB Nijmegen, the Netherlands.

<sup>†</sup>Faculty of Biochemistry and Molecular Medicine, Biocenter Oulu, University of Oulu, PO Box 5400, 90014 Oulu, Finland.

<sup>||</sup>Medicinal Chemistry, Leibniz-Forschungsinstitut für Molekulare Pharmakologie (FMP), Campus Berlin Buch, Robert-Roessle-Str. 10, 13125, Berlin, Germany.

## Contents

**Supplementary Table 1.** East, West, South and Linker variations.

**Supplementary Figure 1.** Co-crystal structures of TNKS2 with inhibitors.

**Supplementary Table 2.** East-side variations of compound **13**.

**Supplementary Table 3.** Inhibition of ARTDs/PARPs.

**Supplementary Figure 2.** Exemplary dose-response measurements of **13** with TNKS1 and TNKS2.

**Supplementary Figure 3.** Quantification of immunoblots shown in Fig. 5a.

**Supplementary Table 4.** Data collection and refinement statistics for the crystal structures.

a)

| East variation | 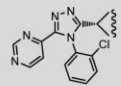   | Biochemical IC <sub>50</sub><br>TNKS2 (nM) | Cellular IC <sub>50</sub><br>HEK293 (nM) |
|----------------|-------------------------------------------------------------------------------------|--------------------------------------------|------------------------------------------|
| 1              |    | 6.3                                        | 19                                       |
| 17             |    | 34                                         | 116                                      |
| 18             |    | 48                                         | 274                                      |
| 36             |    | 5.5                                        | 3                                        |
| 37             |    | 6.4                                        | 30                                       |
| 38             |    | 6.7                                        | 40                                       |
| 39             |    | 4.1                                        | 30                                       |
| 40             |    | 1700                                       | 7880                                     |
| 20             |   | 4.9                                        | 1.7                                      |
| 41             |  | 18                                         | 50                                       |
| 42             |  | 57                                         | 70                                       |
| 43             |  | 3.5                                        | 4                                        |
| 44             |  | 25000                                      | >100000                                  |
| 45             |  | 2.7                                        | 2.4                                      |
| 46             |  | 37                                         | 57                                       |
| 47             |  | 3.0                                        | 6.7                                      |
| 48             |  | 5.4                                        | 1                                        |
| 21             |  | 2.6                                        | 0.048                                    |
| 49             |  | 350                                        | 750                                      |
| 50             |  | 680                                        | 1300                                     |
| 51             |  | 6.6                                        | 32                                       |
| 52             |  | 6300                                       | >10000                                   |
| 53             |  | 1700                                       | 2260                                     |
| 54             |  | 2300                                       | 8900                                     |

b)

| West variation | 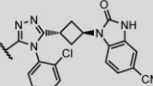   | Biochemical IC <sub>50</sub><br>TNKS2 (nM) | Cellular IC <sub>50</sub><br>HEK293 (nM) |
|----------------|--------------------------------------------------------------------------------------|--------------------------------------------|------------------------------------------|
| 1              |    | 6.3                                        | 19                                       |
| 55             |    | 3.9                                        | 40                                       |
| 56             |    | 8.4                                        | 330                                      |
| 57             |    | 18                                         | 43                                       |
| 58             |    | 5.7                                        | 51                                       |
| 22             |    | 9.3                                        | 21                                       |
| 59             |    | 2.3                                        | 140                                      |
| 60             |    | 23                                         | 290                                      |
| 61             |   | 30                                         | 400                                      |
| 62             |  | 120                                        | 6400                                     |
| 63             |  | 220000                                     | >10000                                   |
| 64             |  | 2600                                       | 8410                                     |

c)

| South variation | 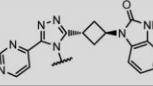   | Biochemical IC <sub>50</sub><br>TNKS2 (nM) | Cellular IC <sub>50</sub><br>HEK293 (nM) |
|-----------------|--------------------------------------------------------------------------------------|--------------------------------------------|------------------------------------------|
| 1               |   | 6.3                                        | 19                                       |
| 65              |  | 15                                         | 200                                      |
| 66              |  | 5.4                                        | 30                                       |
| 67              |  | 19                                         | 260                                      |
| 23              |  | 30                                         | 142                                      |
| 68              |  | 23                                         | 310                                      |
| 69              |  | 50                                         | 590                                      |
| 70              |  | 25                                         | 290                                      |
| 71              |  | 49                                         | 460                                      |
| 72              |  | 170                                        | 300                                      |
| 73              |  | 1700                                       | 1050                                     |
| 74              |  | 5600                                       | >10000                                   |

d)

| Linker variation | 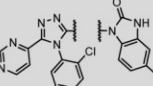 | Biochemical IC <sub>50</sub><br>TNKS2 (nM) | Cellular IC <sub>50</sub><br>HEK293 (nM) |
|------------------|--------------------------------------------------------------------------------------|--------------------------------------------|------------------------------------------|
| 1                |  | 6.3                                        | 19                                       |
| 75               |  | 44                                         | 220                                      |
| 19               |  | 3.6                                        | 4.7                                      |

Supplementary Table 1. (a) East, (b) West, (c) South and Linker (d) variations.

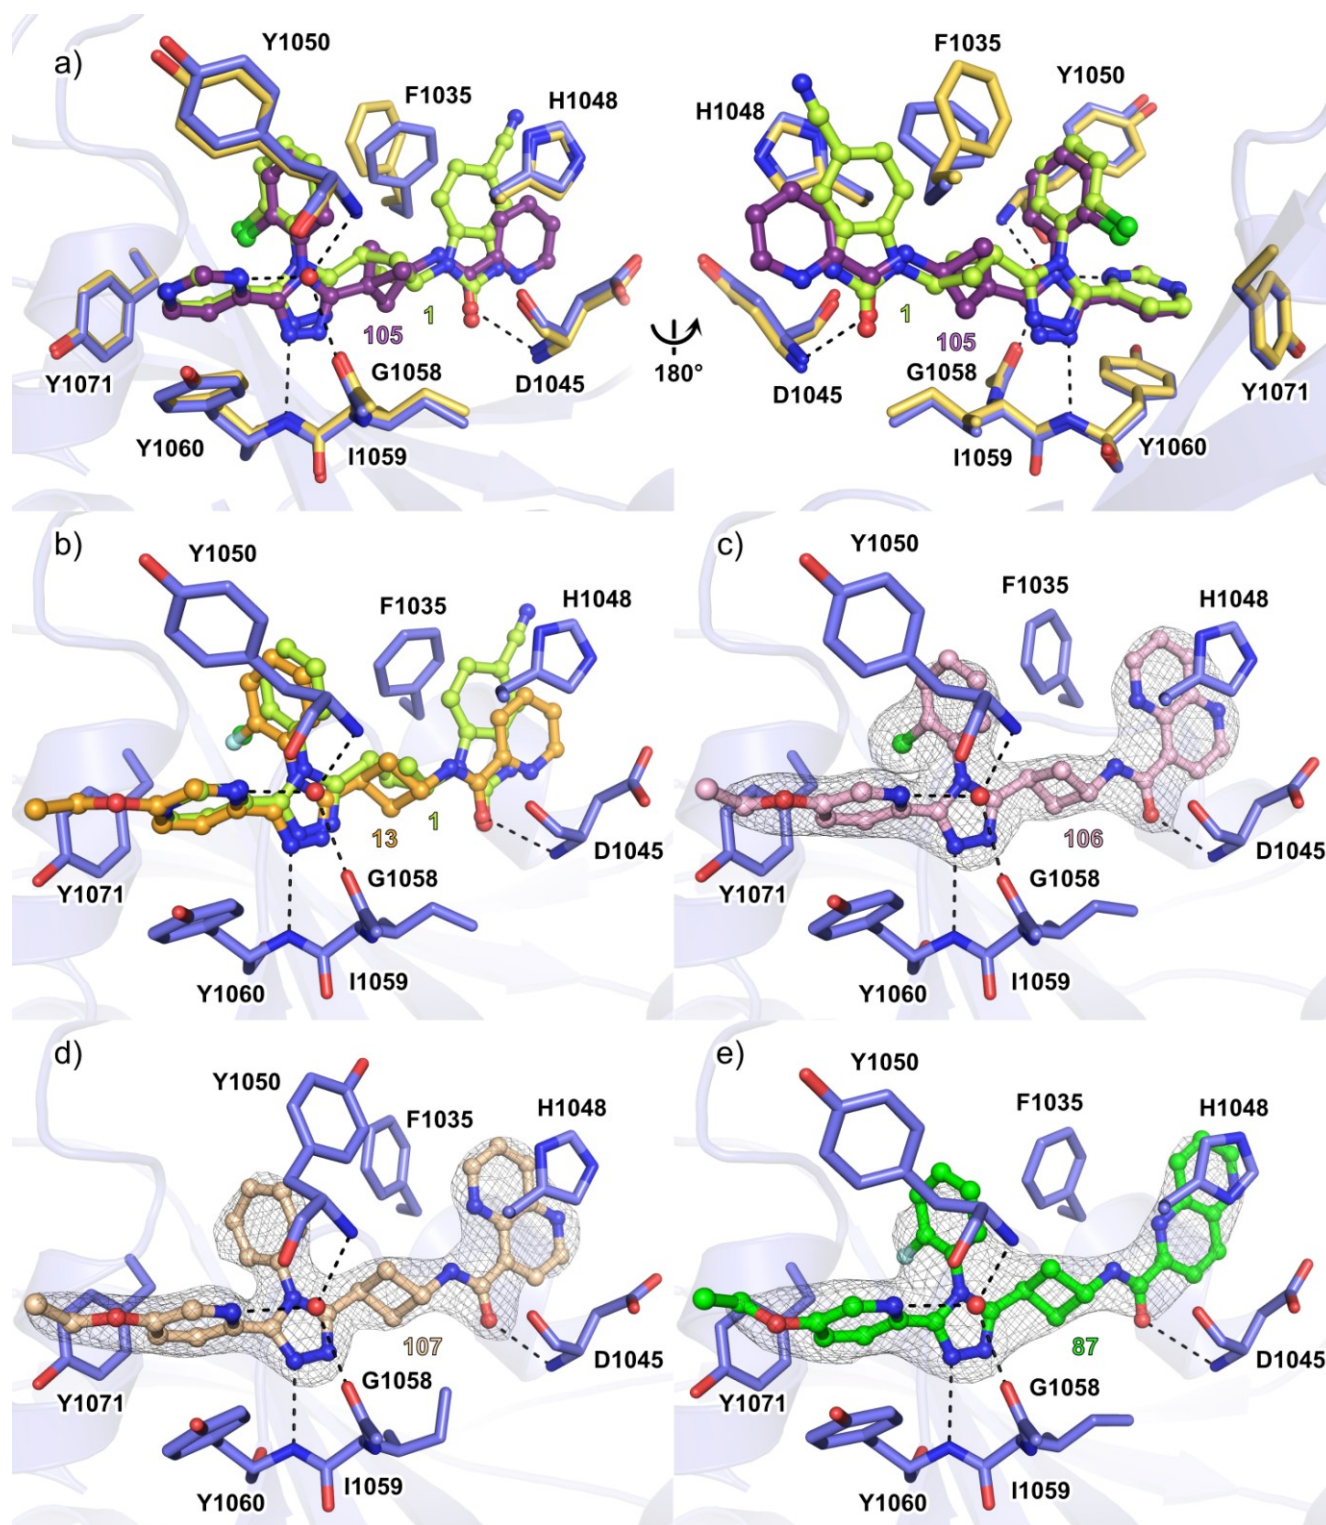

**Supplementary Figure 1.** Co-crystal structures of TNKS2 with inhibitors. (a) Superposition of **105** and **1** co-crystal structures (PDB codes 6TKN, 5NOB) showing the compounds and TNKS2 proteins for the TNKS2-**105** co-crystal structure (blue) and TNKS2-**1** co-crystal structure (yellow). Hydrogen bonds (dashed lines) and a water molecule (red sphere) are shown for the TNKS2-**105** co-crystal structure. (b) Superposition of **13** and **1** co-crystal structures showing the compounds and TNKS2 protein from the TNKS2-**13** co-crystal structure (PDB codes 6TG4, 5NOB). (c) Binding mode of **106** with TNKS2 catalytic domain (PDB code 6TKP). (d) Binding mode of **107** with TNKS2 catalytic domain (PDB code 6TKQ). (e) Binding mode of **87** with TNKS2 catalytic domain (PDB code 6TKR). The  $\sigma_A$  weighted  $2F_o - F_c$  electron density maps around the ligands are contoured at 1.4-1.7 $\sigma$ . Crystal structures were solved with molecular replacement using the structure of TNKS2 (PDB code: 5NOB) as a starting model.

| ID | East point mutations<br>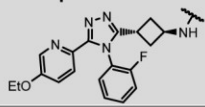 | Biochemical IC <sub>50</sub><br>TNKS2 (nM) | Cellular IC <sub>50</sub><br>HEK293 (nM) | Solubility<br>( $\mu$ M) | ID  |    | 5.4 | 18<br>(13) |
|----|-----------------------------------------------------------------------------------------------------------|--------------------------------------------|------------------------------------------|--------------------------|-----|--------------------------------------------------------------------------------------|-----|------------|
|    |                                                                                                           |                                            |                                          |                          |     |                                                                                      |     |            |
| 76 |                          | 9.5                                        | 73                                       |                          | 92  |    | 10  | 57         |
| 77 |                          | 10                                         | 62                                       |                          | 93  |    | 21  | 67         |
| 13 |                          | 14                                         | 19<br>(>80)                              |                          | 94  |    | 13  | 36         |
| 78 |                          | 4.2                                        | 14                                       |                          | 95  |    | 4.5 | 47         |
| 79 |                          | 4.5                                        | 25                                       |                          | 96  |    | 18  | 65         |
| 80 |                          | 190                                        | 919                                      |                          | 97  |    | 87  | 550        |
| 81 |                          | 5.0                                        | 39                                       |                          | 98  |    | 12  | 100        |
| 82 |                          | 28                                         | 70                                       |                          | 99  |    | 5.0 | 8.0        |
| 83 |                          | 2.1                                        | 1.1<br>(3.4)                             |                          | 100 |    | 4.4 | 34         |
| 10 |                          | 4.3                                        | 0.63<br>(>80)                            |                          | 101 |   | 4.1 | 27         |
| 84 |                          | 2                                          | 0.17<br>(3.1)                            |                          | 102 |  | 19  | 144        |
| 85 |                          | 6.4                                        | 14<br>(14)                               |                          | 103 |  | 14  | 25         |
| 86 |                          | 9.1                                        | 12                                       |                          | 104 |  | 7.4 | 27         |
| 87 |                          | 1.5                                        | 5.0<br>(<2)                              |                          |     |                                                                                      |     |            |
| 88 |                         | 2.8                                        | 7.5<br>(>80)                             |                          |     |                                                                                      |     |            |
| 89 |                        | 19                                         | 78<br>(<2)                               |                          |     |                                                                                      |     |            |
| 90 |                        | 4.9                                        | 14<br>(<2)                               |                          |     |                                                                                      |     |            |

Supplementary Table 2. East-side variations of compound 13.

|                                                                | 1**                   | 13                    |
|----------------------------------------------------------------|-----------------------|-----------------------|
| ARTD1/PARP1 ( $\mu\text{M}$ )                                  | >100                  | 29                    |
| ARTD2/PARP2 ( $\mu\text{M}$ )                                  | >100                  | 26                    |
| ARTD3/PARP3 ( $\mu\text{M}$ )                                  | >100                  | 75                    |
| ARTD4/PARP4 ( $\mu\text{M}$ )                                  | >100                  | >100                  |
| ARTD5/TNKS1 (nM)                                               | 29 (7.54 $\pm$ 0.007) | 127 (6.90 $\pm$ 0.05) |
| ARTD6/TNKS2 (nM)                                               | 6.3 (8.20 $\pm$ 0.03) | 14 (7.85 $\pm$ 0.04)  |
| ARTD7/PARP15 <sup><math>\Delta</math></sup> ( $\mu\text{M}$ )  | > 10                  | >>10                  |
| ARTD8/PARP14 ( $\mu\text{M}$ )                                 | > 10                  | >100                  |
| ARTD10/PARP10 ( $\mu\text{M}$ )                                | > 10                  | >> 10                 |
| ARTD12/PARP12 <sup><math>\Delta</math></sup> ( $\mu\text{M}$ ) | > 10                  | >>10                  |

>> no inhibition detected  
> below 50% inhibition  
 $\Delta$  concentration limited by DMSO tolerance  
\*\* reference 11

**Supplementary Table 3.** Inhibition of ARTDs/PARPs ( $\text{IC}_{50}$  [ $\text{pIC}_{50}\pm\text{SEM}$ ]).

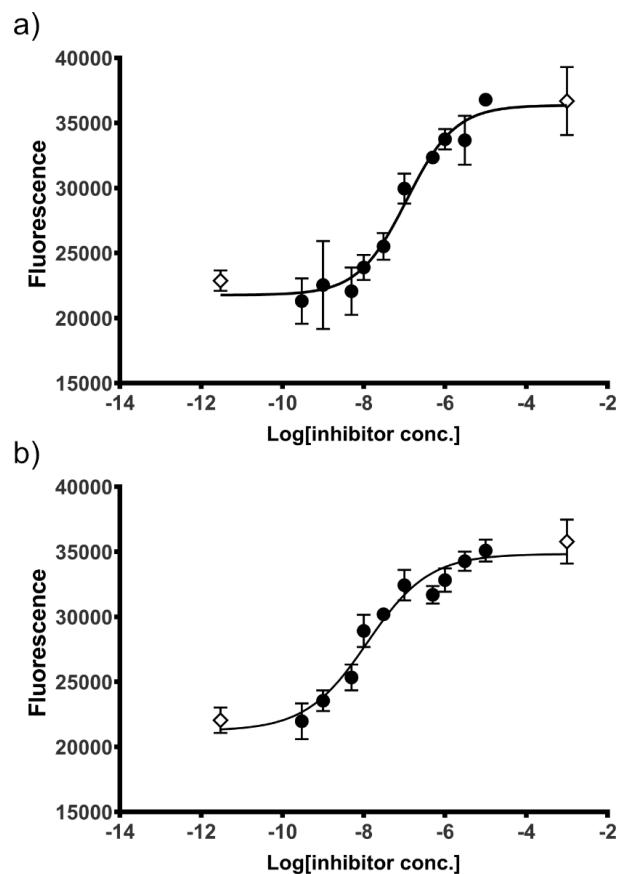

**Supplementary Figure 2.** Exemplary dose-response measurements of 13 with TNKS1 (a) and TNKS2 (b). The measurements were fitted using 4-parameters with GraphPad Prism. As compound showed no fluorescence interference, raw values were used for the fit. Controls were placed 2-logarithm units below or above the highest, and lowest compound concentrations (open diamonds).

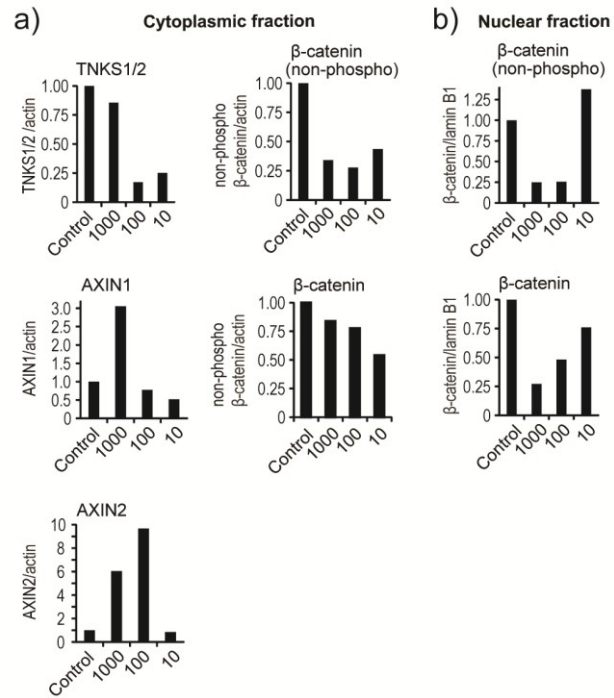

**Supplementary Figure 3.** Quantification of immunoblots (protein/actin or lamin B1 loading controls) relative to controls (0.01% DMSO = 1) shown in Fig. 5a. (a) Cytoplasmic TNKS1/2, AXIN1, AXIN2, transcriptionally active  $\beta$ -catenin (non-phospho) and  $\beta$ -catenin. (b) Nuclear active  $\beta$ -catenin and  $\beta$ -catenin.



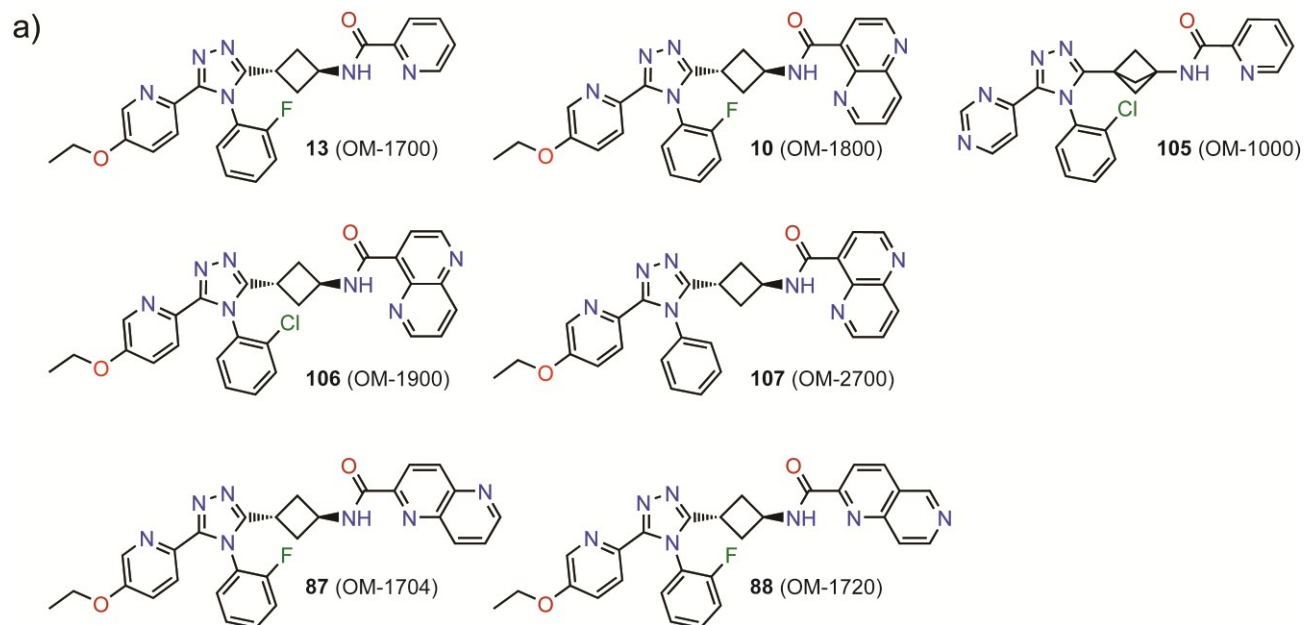

b)

| Compound                              | 13                                            | 10                                            | 105                                           | 106                                           | 107                                           | 87                                            | 88                                            |
|---------------------------------------|-----------------------------------------------|-----------------------------------------------|-----------------------------------------------|-----------------------------------------------|-----------------------------------------------|-----------------------------------------------|-----------------------------------------------|
| PDB code                              | 6TG4                                          | 6TKM                                          | 6TKN                                          | 6TKP                                          | 6TKQ                                          | 6TKR                                          | 6TKS                                          |
| Beam line                             | ESRF ID30B                                    | DLS I04                                       | ESRF ID30B                                    | ESRF ID23-1                                   | ESRF ID23-1                                   | DLS I04                                       | ESRF ID30A-1                                  |
| Wavelength (Å)                        | 0.9677                                        | 0.9795                                        | 0.97625                                       | 1.03285                                       | 0.97625                                       | 0.9795                                        | 0.966                                         |
| Space group                           | P2 <sub>1</sub> 2 <sub>1</sub> 2 <sub>1</sub> | P2 <sub>1</sub> 2 <sub>1</sub> 2 <sub>1</sub> | P2 <sub>1</sub> 2 <sub>1</sub> 2 <sub>1</sub> | P2 <sub>1</sub> 2 <sub>1</sub> 2 <sub>1</sub> | P2 <sub>1</sub> 2 <sub>1</sub> 2 <sub>1</sub> | P2 <sub>1</sub> 2 <sub>1</sub> 2 <sub>1</sub> | P2 <sub>1</sub> 2 <sub>1</sub> 2 <sub>1</sub> |
| Cell dimensions                       | 42.68,                                        | 42.32,                                        | 41.73,                                        | 42.01,                                        | 42.12,                                        | 41.99,                                        | 41.60,                                        |
| a, b, c (Å)                           | 77.9,                                         | 77.41,                                        | 76.76,                                        | 77.08,                                        | 76.84,                                        | 76.76,                                        | 76.42,                                        |
|                                       | 149.52                                        | 148.68                                        | 147.91                                        | 148.36                                        | 148.8                                         | 148.12                                        | 148.19                                        |
| Resolution (Å)                        | 37 - 2.76<br>(2.86-2.76)                      | 29.7 - 2.7<br>(2.80- 2.7)                     | 38.4 - 2.5<br>(2.59- 2.5)                     | 41.6 - 2.4<br>(2.49- 2.4)                     | 41.7 - 2.5<br>(2.59- 2.5)                     | 41.5 - 2.75<br>(2.85- 2.75)                   | 42 - 2.50<br>(2.56-2.50)                      |
| R <sub>merge</sub>                    | 29.0 (153.7)                                  | 24.4 (114.4)                                  | 22.0 (151.7)                                  | 12.1 (87.4)                                   | 19.7 (85.1)                                   | 30.1 (200.1)                                  | 10.1 (72.5)                                   |
| I / σI                                | 5.33 (1.06)                                   | 5.09 (1.21)                                   | 7.64 (1.10)                                   | 11.03 (1.93)                                  | 8.37 (2.04)                                   | 5.66 (1.12)                                   | 9.91 (2.03)                                   |
| Completeness (%)                      | 99.3 (99.6)                                   | 98.4 (99.9)                                   | 99.8 (99.6)                                   | 99.8 (99.9)                                   | 99.7 (99.5)                                   | 98.3 (99.5)                                   | 99.3 (98.7)                                   |
| Redundancy                            | 6.2 (5.8)                                     | 3.4 (3.5)                                     | 6.3 (6.5)                                     | 6.5 (6.3)                                     | 6.5 (6.7)                                     | 6.4 (6.5)                                     | 5.4 (5.7)                                     |
| <b>Refinement</b>                     |                                               |                                               |                                               |                                               |                                               |                                               |                                               |
| R <sub>work</sub> / R <sub>free</sub> | 0.226/0.270                                   | 0.237/0.265                                   | 0.201/ 0.244                                  | 0.202/ 0.231                                  | 0.188/0.229                                   | 0.228/0.282                                   | 0.214/0.259                                   |
| <b>B-factors</b>                      |                                               |                                               |                                               |                                               |                                               |                                               |                                               |
| Protein                               | 49                                            | 42                                            | 45                                            | 44                                            | 35                                            | 55                                            | 58                                            |
| Inhibitor                             | 42                                            | 31                                            | 38                                            | 36                                            | 24                                            | 41                                            | 51                                            |
| <b>R.m.s.d.</b>                       |                                               |                                               |                                               |                                               |                                               |                                               |                                               |
| Bond lengths (Å)                      | 0.013                                         | 0.013                                         | 0.013                                         | 0.013                                         | 0.013                                         | 0.013                                         | 0.013                                         |
| Bond angles (°)                       | 1.72                                          | 1.64                                          | 1.72                                          | 1.64                                          | 1.79                                          | 1.72                                          | 1.66                                          |
| <b>Ramachandran plot (%)</b>          |                                               |                                               |                                               |                                               |                                               |                                               |                                               |
| Favored regions                       | 97.22                                         | 97.24                                         | 96.03                                         | 99.5                                          | 99                                            | 96.02                                         | 97.01                                         |
| Additionally allowed regions          | 2.78                                          | 2.76                                          | 3.97                                          | 0.5                                           | 1                                             | 3.98                                          | 2.99                                          |

**Supplementary Table 4.** (a) Structures for compounds shown in (b). (b) Data collection and refinement statistics for the crystal structures.
